# Supplementary material
Source: PubMed Central journal article supplement (PMC4604040)
Supplement: NIHMS708988-supplement-01.pdf [file NIHMS708988-supplement-01.pdf]

## 680 SUPPLEMENTAL TABLES

681 **Table S1. Comparison of baseline characteristics of included and excluded patients**  
682 **based on disease progression at Day +120.**

|                                     | <b>Disease Progression<br/>≤ Day + 120<br/>(Excluded)<br/>N (%)</b> | <b>Disease Progression<br/>&gt; Day + 120<br/>(Included)<br/>N (%)</b> | <b>P</b> |
|-------------------------------------|---------------------------------------------------------------------|------------------------------------------------------------------------|----------|
| <b>Total patients</b>               | 105                                                                 | 378                                                                    |          |
| <b>Sex</b>                          |                                                                     |                                                                        |          |
| Female                              | 48 (46)                                                             | 185 (49)                                                               |          |
| Male                                | 57 (54)                                                             | 193 (51)                                                               | 0.5      |
| <b>Age</b>                          |                                                                     |                                                                        |          |
| ≤50                                 | 56 (53)                                                             | 231 (61)                                                               |          |
| >50                                 | 49 (47)                                                             | 147 (39)                                                               | 0.1      |
| <b>Diagnosis</b>                    |                                                                     |                                                                        |          |
| AML                                 | 81 (77)                                                             | 305 (81)                                                               |          |
| MDS                                 | 24 (23)                                                             | 73 (19)                                                                | 0.4      |
| <b>Disease Status at Transplant</b> |                                                                     |                                                                        |          |
| CR1                                 | 22 (21)                                                             | 158 (42)                                                               | <0.001   |
| CR2                                 | 8 (8)                                                               | 66 (17)                                                                |          |
| Not CR                              | 75 (71)                                                             | 154 (41)                                                               |          |
| <b>Cytogenetics</b>                 |                                                                     |                                                                        |          |
| Good Risk                           | 4 (4)                                                               | 50 (13)                                                                | <0.001   |
| Intermediate Risk                   | 41 (39)                                                             | 196 (52)                                                               |          |
| Poor Risk                           | 57 (54)                                                             | 121 (32)                                                               |          |
| Unknown                             | 3 (3)                                                               | 11 (3)                                                                 |          |
| <b>FLT3 ITD Mutation</b>            |                                                                     |                                                                        |          |
| Yes                                 | 23 (22)                                                             | 45 (12)                                                                |          |
| No                                  | 58 (55)                                                             | 224 (59)                                                               | 0.02     |
| N/A                                 | 24 (23)                                                             | 109 (29)                                                               |          |
| <b>Modified ELN Classification</b>  |                                                                     |                                                                        |          |
| Favorable                           | 13 (12)                                                             | 114 (30)                                                               |          |
| Intermediate 1*                     | 10 (9)                                                              | 32 (8)                                                                 |          |
| Intermediate 2                      | 26 (25)                                                             | 75 (20)                                                                |          |
| Adverse                             | 47 (45)                                                             | 85 (22)                                                                | <0.001   |
| Cg normal, FLT3 ITD N/A             | 6 (6)                                                               | 56 (15)                                                                |          |
| Cg N/A                              | 3 (3)                                                               | 16 (4)                                                                 |          |

|                                     |         |          |      |
|-------------------------------------|---------|----------|------|
| <b>Stem Cell Source</b>             |         |          |      |
| Bone Marrow                         | 43 (41) | 135 (36) |      |
| Peripheral Blood                    | 61 (58) | 242 (64) | 0.3  |
| Cord Blood                          | 1 (1)   | 1 (0)    |      |
| <b>Donor type</b>                   |         |          |      |
| Match-related donor                 | 39 (37) | 195 (52) |      |
| Other                               | 66 (63) | 183 (48) | 0.01 |
| <b>GVHD prophylaxis</b>             |         |          |      |
| Tacrolimus/Methotrexate             | 94 (90) | 335 (89) |      |
| Tacrolimus/Methotrexate/Pentostatin | 11 (10) | 42 (11)  | 0.8  |
| Other                               | 0       | 1 (0)    |      |

683

684

685

686

687

688

689

690

691

692

693

694

695

696

697

698

699

700

701

702

703

704

705

706

707

708

709 **Table S2. T-lymphocyte donor chimerism and disease progression in CR1/CR2 patients**  
 710 **at time of transplant.**

| <b>% Donor T-lymphocyte Chimerism</b> | <b>Total N=164</b> | <b>Progressed N=30</b> | <b>HR at 3 yrs</b> | <b>95% CI</b> | <b><i>P</i></b> |
|---------------------------------------|--------------------|------------------------|--------------------|---------------|-----------------|
| 100                                   | 70                 | 9                      | Ref.               |               |                 |
| 96-99                                 | 15                 | 3                      | 1.7                | 0.45-6.2      | 0.4             |
| 86-95                                 | 34                 | 5                      | 1.2                | 0.4-3.7       | 0.7             |
| 76-85                                 | 18                 | 6                      | 2.9                | 1.03-8.1      | 0.04            |
| 51-75                                 | 12                 | 3                      | 2.1                | 0.6-7.8       | 0.3             |
| ≤50                                   | 15                 | 4                      | 2.1                | 0.6-6.8       | 0.2             |

711 Ref. indicates reference

712

713

714

715

716

717

718

719

720

721

722

723

724

725

726

727

728

729

730

731 **Table S3. T-lymphocyte donor chimerism and disease progression in non-CR1/CR2**  
 732 **patients at time of transplant.**

| <b>% Donor<br/>T-lymphocyte<br/>Chimerism</b> | <b>Total<br/>N=101</b> | <b>Progressed<br/>N=34</b> | <b>HR at 3 yrs</b> | <b>95% CI</b> | <b><i>P</i></b> |
|-----------------------------------------------|------------------------|----------------------------|--------------------|---------------|-----------------|
| 100                                           | 61                     | 19                         | Ref.               |               |                 |
| 96-99                                         | 10                     | 2                          | 0.96               | 0.1-7.2       | 0.9             |
| 86-95                                         | 11                     | 6                          | 2.4                | 0.8-7.1       | 0.1             |
| 76-85                                         | 8                      | 2                          | 0.8                | 0.2-3.4       | 0.8             |
| 51-75                                         | 8                      | 4                          | 1.9                | 0.8-4.8       | 0.2             |
| ≤50                                           | 3                      | 1                          | 0.6                | 0.1-2.7       | 0.5             |

733 Ref. indicates reference

734

735

736

737

738

739

740

741

742

743

744

745

746

747

748

749

750

751  
752  
753  
754  
755  
756  
757  
758  
759  
760  
761  
762  
763  
764  
765

**Table S4. Rate of disease progression by 3 years post-transplant: Subset analysis by disease status at transplant and day +90 to +120 T-lymphocyte chimerism status.**

| % Donor T-lymphocyte chimerism | CR1/CR2 |         |          | Non-CR1/CR2 |         |          |
|--------------------------------|---------|---------|----------|-------------|---------|----------|
|                                | HR      | 95% CI  | <i>P</i> | HR          | 95% CI  | <i>P</i> |
| 100                            | Ref.    |         |          | Ref.        | Ref.    |          |
| 86-99                          | 1.4     | 0.5-3.5 | .5       | 1.3         | 0.6-3.2 | .5       |
| ≤85                            | 2.4     | 1.0-5.6 | .04      | 1.3         | 0.5-2.9 | .6       |

766 Ref. indicates reference.

767  
768  
769  
770  
771  
772  
773  
774  
775  
776  
777  
778  
779  
780  
781  
782  
783  
784  
785  
786  
787  
788

789  
790  
791  
792  
793  
794  
795  
796  
797  
798  
799  
800  
801  
802

**Table S5. Risk of disease progression according to day +90 to +120 T-lymphocyte chimerism.**

|                 | CR1/CR2 |          |          | Non-CR1/CR2 |         |          |
|-----------------|---------|----------|----------|-------------|---------|----------|
|                 | *HR     | 95% CI   | <i>P</i> | *HR         | 95% CI  | <i>P</i> |
| <b>6 months</b> | 1.9     | 0.6-5.9  | 0.3      | 2.4         | 0.8-7.1 | 0.1      |
| <b>1 year</b>   | 2.3     | 1.1-5    | 0.03     | 2           | 0.8-4.9 | 0.1      |
| <b>2 years</b>  | 2.2     | 1.1-4.6  | 0.03     | 1.5         | 0.6-3.5 | 0.3      |
| <b>3 years</b>  | 2.1     | 1.02-4.3 | 0.04     | 1.3         | 0.5-2.9 | 0.6      |

803 \*Hazard ratio (HR) reflects comparison of the rate of progression according to day +90 to +120  
804 T-lymphocyte donor chimerism status ( $\leq 85\%$  vs.  $>85\%$ )

805  
806  
807  
808  
809  
810  
811  
812  
813  
814  
815  
816  
817  
818  
819  
820  
821  
822  
823  
824  
825
